# Supplementary material for: Clinical and Economic Burden of Pediatric Mild-to-Moderate Atopic Dermatitis: A Population-Based Nested Case–Control Study in Sweden
Source: Springer Nature journal article supplement (doi:10.1007/s13555-020-00470-z), 2020-12-18
Supplement: MOESM1 [file 18700270]

## SUPPLEMENTARY MATERIAL

### **Inclusion criteria:**

At least two dispensations of D07 (Corticosteroids for topical use) not longer than 12 months apart:

At least one dispensation of D11AH

At least one secondary care contact with main diagnosis (ICD-10) L20+ or L308C

### **Exclusion criteria:**

Table S.I: Exclusion criteria 1

| <b>Condition</b>                                      | <b>Diagnosis code</b> |
|-------------------------------------------------------|-----------------------|
| Seborrhoeic dermatitis                                | L21                   |
| Diaper dermatitis                                     | L22                   |
| Allergic contact dermatitis                           | L23                   |
| Irritant contact dermatitis                           | L24                   |
| Unspecified contact dermatitis                        | L25                   |
| Exfoliative dermatitis                                | L26                   |
| Dermatitis due to substances taken internally         | L27                   |
| Lichen simplex chronicus and prurigo”                 | L28                   |
| Pruritus                                              | L29                   |
| Other dermatitis                                      | L30 (except L308C)    |
| Papulosquamous disorders                              | L40-L45               |
| Other erythematosus conditions                        | L53                   |
| Sunburn                                               | L55                   |
| Other acute skin changes due to ultraviolet radiation | L56                   |
| Vitiligo                                              | L80                   |

|                                |     |
|--------------------------------|-----|
| Atrophic disorders of the skin | L90 |
| Lupus erythematosus            | L93 |

Table S.II: Exclusion criteria 2

| <b>Drug group</b>                                      | <b>ATC code</b> |
|--------------------------------------------------------|-----------------|
| Antipsoriasisics                                       | D05             |
| Salicylates for dermatological use                     | D02AF           |
| Corticosteroids other combinations, moderate or potent | D07XB or D07XC  |
| Corticosteroids (group IV) clobetasol                  | D07AD01         |
| Clobetasol and antibiotics and antifungals             | D07CD01 and D01 |

Table S.III: Annual healthcare resource use by type and year after index date

|                                                  | Pediatric mild-to-moderate cohort |       |        |        | Reference cohort   |      |        |       | Pediatric mild-to-moderate cohort vs. Reference cohort |        |         |
|--------------------------------------------------|-----------------------------------|-------|--------|--------|--------------------|------|--------|-------|--------------------------------------------------------|--------|---------|
|                                                  | number of patients                | Mean  | Median | sd     | number of patients | Mean | Median | sd    | Mean difference                                        | t-test | p-value |
| <b>Number of secondary care visits, any type</b> |                                   |       |        |        |                    |      |        |       |                                                        |        |         |
| <i>0-1 year after index</i>                      | 87,721                            | 2.25  | 1      | 3.36   | 87,721             | 0.96 | 0      | 2.14  | 1.29                                                   | 36.19  | 0.000   |
| <i>1-2 years after index</i>                     | 75,704                            | 1.65  | 1      | 2.85   | 75,704             | 0.86 | 0      | 2.01  | 0.79                                                   | 31.03  | 0.000   |
| <i>2-3 years after index</i>                     | 63,501                            | 1.35  | 0      | 2.55   | 63,501             | 0.77 | 0      | 1.95  | 0.58                                                   | 29.25  | 0.000   |
| <i>3-4 year after index</i>                      | 54,156                            | 1.22  | 0      | 2.44   | 54,156             | 0.75 | 0      | 1.93  | 0.47                                                   | 26.25  | 0.000   |
| <i>4-5 years after index</i>                     | 45,324                            | 1.15  | 0      | 2.33   | 45,324             | 0.74 | 0      | 1.91  | 0.41                                                   | 23.95  | 0.000   |
| <b>Number of dispensed drugs, any type</b>       |                                   |       |        |        |                    |      |        |       |                                                        |        |         |
| <i>0-1 year after index</i>                      | 87,721                            | 12.50 | 6      | 128.33 | 87,721             | 3.39 | 0      | 57.17 | 9.12                                                   | 11.85  | 0.000   |
| <i>1-2 years after index</i>                     | 75,704                            | 10.36 | 3      | 92.94  | 75,704             | 3.60 | 0      | 72.97 | 6.76                                                   | 8.93   | 0.000   |
| <i>2-3 years after index</i>                     | 63,501                            | 8.37  | 2      | 69.92  | 63,501             | 3.52 | 0      | 82.58 | 4.86                                                   | 7.60   | 0.000   |
| <i>3-4 year after index</i>                      | 54,156                            | 7.58  | 2      | 76.88  | 54,156             | 3.35 | 0      | 79.94 | 4.23                                                   | 9.37   | 0.000   |
| <i>4-5 years after index</i>                     | 45,324                            | 7.26  | 1      | 84.40  | 45,324             | 3.00 | 0      | 57.84 | 4.26                                                   | 9.16   | 0.000   |

Table S.IV: Annual direct medical cost by type and year after index date

| Variable description                           | Pediatric mild-to-moderate cohort |       |        |       | Reference cohort   |      |        |       | Pediatric mild-to-moderate cohort vs. Reference cohort |        |         |
|------------------------------------------------|-----------------------------------|-------|--------|-------|--------------------|------|--------|-------|--------------------------------------------------------|--------|---------|
|                                                | number of patients                | Mean  | Median | sd    | number of patients | Mean | Median | sd    | Mean difference                                        | t-test | p-value |
| <b>Cost of secondary care visits, any type</b> |                                   |       |        |       |                    |      |        |       |                                                        |        |         |
| <i>0-1 year after index</i>                    | 87,721                            | 886   | 279    | 2,563 | 87,721             | 458  | 0      | 2,004 | 428                                                    | 39.00  | 0.00    |
| <i>1-2 years after index</i>                   | 75,704                            | 586   | 275    | 1,695 | 75,704             | 338  | 0      | 1,507 | 248                                                    | 30.13  | 0.00    |
| <i>2-3 years after index</i>                   | 63,501                            | 478   | 0      | 1,599 | 63,501             | 291  | 0      | 1,422 | 187                                                    | 21.97  | 0.00    |
| <i>3-4 year after index</i>                    | 54,156                            | 419   | 0      | 1,373 | 54,156             | 271  | 0      | 1,197 | 148                                                    | 18.89  | 0.00    |
| <i>4-5 years after index</i>                   | 45,324                            | 386   | 0      | 1,190 | 45,324             | 279  | 0      | 1,666 | 107                                                    | 11.13  | 0.00    |
| <b>Cost of dispensed drugs, any type</b>       |                                   |       |        |       |                    |      |        |       |                                                        |        |         |
| <i>0-1 year after index</i>                    | 87,721                            | 225   | 80     | 1,917 | 87,721             | 67   | 0      | 1,211 | 159                                                    | 20.71  | 0.00    |
| <i>1-2 years after index</i>                   | 75,704                            | 198   | 49     | 2,911 | 75,704             | 70   | 0      | 1,157 | 128                                                    | 11.27  | 0.00    |
| <i>2-3 years after index</i>                   | 63,501                            | 166   | 32     | 2,187 | 63,501             | 70   | 0      | 1,027 | 96                                                     | 10.05  | 0.00    |
| <i>3-4 year after index</i>                    | 54,156                            | 160   | 24     | 2,583 | 54,156             | 75   | 0      | 1,213 | 85                                                     | 6.93   | 0.00    |
| <i>4-5 years after index</i>                   | 45,324                            | 157   | 21     | 2,353 | 45,324             | 80   | 0      | 1,386 | 77                                                     | 5.98   | 0.00    |
| <b>Total direct health-care costs</b>          |                                   |       |        |       |                    |      |        |       |                                                        |        |         |
| <i>0-1 year after index</i>                    | 87,721                            | 1,111 | 409    | 3,416 | 87,721             | 524  | 21     | 2,446 | 587                                                    | 41.39  | 0.00    |
| <i>1-2 years after index</i>                   | 75,704                            | 784   | 293    | 3,510 | 75,704             | 408  | 20     | 2,020 | 377                                                    | 25.59  | 0.00    |
| <i>2-3 years after index</i>                   | 63,501                            | 644   | 187    | 2,853 | 63,501             | 361  | 15     | 1,903 | 283                                                    | 20.79  | 0.00    |
| <i>3-4 year after index</i>                    | 54,156                            | 578   | 101    | 3,060 | 54,156             | 346  | 11     | 1,861 | 233                                                    | 15.13  | 0.00    |
| <i>4-5 years after index</i>                   | 45,324                            | 543   | 77     | 2,776 | 45,324             | 359  | 9      | 2,271 | 184                                                    | 10.90  | 0.00    |
